1 **Does pericentral mu-rhythm “power” corticomotor excitability? – a**  
2 **matter of EEG perspective**

3

4

5

6 Anke Ninija Karabanov\*<sup>1,2</sup>, Kristoffer Hougaard Madsen\*<sup>1,3</sup>, Lærke Gebser Krohne<sup>1,3</sup>,  
7 Hartwig Roman Siebner<sup>1,4,5</sup>

8

9 <sup>1</sup> Danish Research Centre for Magnetic Resonance, Centre for Functional and Diagnostic Imaging  
10 and Research, Copenhagen University Hospital, Amager and Hvidovre, Hvidovre, Denmark

11 <sup>2</sup> Department of Nutrition, Exercise and Sports, University of Copenhagen, Copenhagen, Denmark

12 <sup>3</sup> Department of Applied Mathematics and Computer Science, Technical University of Denmark,  
13 Denmark

14 <sup>4</sup> Department of Neurology, Copenhagen University Hospital Bispebjerg, Copenhagen, Denmark

15 <sup>5</sup> Institute for Clinical Medicine, Faculty of Medical and Health Sciences, University of Copenhagen,  
16 Copenhagen, Denmark

17

18 \* These authors contributed equally to the work

19

1 **Abstract**

2 **Background:** Electroencephalography (EEG) and single-pulse transcranial magnetic  
3 stimulation (spTMS) of the primary motor hand area (M1-HAND) have been combined  
4 to explore whether the instantaneous expression of pericentral mu-rhythm drives  
5 fluctuations in corticomotor excitability, but this line of research has yielded diverging  
6 results.

7 **Objectives:** To re-assess the relationship between the mu-rhythm power expressed in  
8 left pericentral cortex and the amplitude of motor potentials (MEP) evoked with  
9 spTMS in left M1-HAND.

10 **Methods:** 15 non-preselected healthy young participants received spTMS to the  
11 motor hot spot of left M1-HAND. Regional expression of mu-rhythm was estimated  
12 online based on a radial source at motor hotspot and informed the timing of spTMS  
13 which was applied either during epochs belonging to the highest or lowest quartile of  
14 regionally expressed mu-power. Using MEP amplitude as dependent variable, we  
15 computed a linear mixed-effects model, which included mu-power and mu-phase at  
16 the time of stimulation and the inter-stimulus interval (ISI) as fixed effects and subject  
17 as a random effect. Mu-phase was estimated by post-hoc sorting of trials into four  
18 discrete phase bins. We performed a follow-up analysis on the same EEG-triggered  
19 MEP data set in which we isolated mu-power at the sensor level using a Laplacian  
20 montage centered on the electrode above the M1-HAND.

21 **Results:** Pericentral mu-power traced as radial source at motor hot spot did not  
22 significantly modulate the MEP, but mu-power determined by the surface Laplacian  
23 did, showing a positive relation between mu-power and MEP amplitude. In neither  
24 case, there was an effect of mu-phase on MEP amplitude.

- 1 **Conclusion:** The relationship between cortical oscillatory activity and cortical
- 2 excitability is complex and minor differences in the methodological choices may
- 3 critically affect sensitivity.
- 4

## 1 **Introduction**

2

3 Alpha oscillations (8-12Hz) are a distinct feature of human cortical activity. Initially  
4 interpreted to reflect “cortical idling” [1] they are today assumed to have an active  
5 role in neural processing: According to the “gating-through-inhibition” hypothesis,  
6 alpha oscillations gate information by active inhibition of task irrelevant areas [2, 3].  
7 This hypothesis is supported by studies that demonstrated an increase in alpha  
8 power over task-irrelevant cortical areas with simultaneous decrease of alpha power  
9 in task-relevant areas [2-5]. Instantaneous fluctuations also actively influence task  
10 performance and several studies have shown that performance on perceptual tasks  
11 increases, when stimuli are presented during periods of low alpha power [5-7].

12

13 While alpha oscillations are most prominent in the occipito-parietal cortex, they are  
14 also expressed in pericentral, sensorimotor cortex where they are called mu-rhythm  
15 [8-11]. Invasive recordings in monkeys provided evidence that mu-oscillations in the  
16 sensorimotor cortex follow the gating-through-inhibition hypothesis: Low  
17 sensorimotor mu power predicted an increase in neuronal spiking and increased  
18 performance on a tactile perception task [12]. Motor Evoked Potentials (MEPs)  
19 induced by single-pulse Transcranial Magnetic Stimulation (spTMS) offer a unique  
20 possibility to probe the transsynaptic excitability of fast-conducting corticospinal  
21 pathways noninvasively in humans. Several studies used spTMS to examine if the  
22 pre-TMS mu-power modulates corticospinal excitability (i.e. the MEP amplitude)  
23 using post-hoc grouping of MEPs according to pre-stimulus power. Early studies  
24 seem to support the gating-through-inhibition hypothesis and report associations  
25 between low mu-power and higher MEP amplitudes [13-15], but these findings

1 could not be replicated by a number of often better-powered studies [16-21] ( See  
2 [22] for a detailed, tabular report of studies grouping MEPs according to pre-  
3 stimulus power). Real-time EEG-triggered stimulation systems makes it possible to  
4 assess the relationship between mu-oscillatory activity and MEP amplitude more  
5 effectively through online targeting of specific oscillation states [13-15]. In contrast  
6 to the studies using post-hoc grouping, several real-time mu-triggered experiments  
7 report a positive relationship between mu-power and MEP amplitude, suggesting  
8 mu-facilitation rather than a mu-inhibition in the corticospinal system [23-25].  
9  
10 Considering the contradictory evidence from spTMS studies, it is paramount to  
11 understand the physiological effects of basic stimulation parameters before the  
12 findings of these studies can be used to support or challenge theoretical ideas like  
13 the gating-through-inhibition hypothesis. Recently, a real-time EEG-triggered TMS  
14 study by Ogata and coworkers found a positive relationship between mu-power and  
15 MEP amplitude, but only at higher TMS intensities and when participants had their  
16 eyes open. No such relationship emerged at low stimulus intensity or when  
17 participants had their eyes closed [24]. This suggests that the relationship between  
18 mu-power and corticospinal excitability is not fixed but critically depends on extrinsic  
19 (i.e. experimental stimulation and recording set-up) and intrinsic (i.e., brain state)  
20 factors.  
21 One important experimental factor is the way how the oscillatory cortical activity of  
22 interest is “distilled” from the EEG activity recorded at the scalp level [22, 26, 27]. In  
23 this regard, it is noteworthy that all mu-triggered studies, that report a positive  
24 linear relationship between mu-power and MEP amplitude used a sensor-level

1 Laplacian montage centered above the M1 [23, 24]. Conversely, post hoc-studies  
2 that have shown a negative linear relationship or no relationship at all between mu-  
3 power and MEP amplitude have predominantly used source projections or the  
4 averaged activity in a cluster of surface electrodes [13, 14, 16, 18, 19, 22].  
5 To re-examine the relation between mu-power and cortico-spinal excitability, as  
6 reflected by MEP amplitude, we employed mu-triggered spTMS using an individual  
7 source projection to trace pericentral mu-activity. We applied brain-state informed  
8 EEG-TMS for real-time power estimation and targeted the highest and lowest 25% of  
9 mu-power in each individual. In addition, we also re-referenced our data using a  
10 sensor level Laplacian montage centered over M1-HAND and used post-hoc trial  
11 sorting, to test whether the EEG montage used to extract power influenced the  
12 detected relationship between MEP amplitude and mu power. For both methods,  
13 we also defined the pre-stimulus phase and the inter-stimulus interval between two  
14 pulses and used these as covariates to explore their ability to predict MEP  
15 amplitudes.

16

## 17 **Methods**

### 18 **Subjects:**

19 15 right-handed healthy participants took part in this study (7 female, average age=  
20 24,1 ±2.8 years). The sample size was based on previous studies using state-  
21 informed brain stimulation to investigate cortico-spinal excitability [22, 28]. We did  
22 not perform any preselection based on individual TMS or EEG characteristics (e.g.  
23 size of the single alpha-band peak or resting Motor Threshold (rMT)). Subjects were  
24 allowed to enroll in the study if they were right-handed and between 18-40 years of

1 age and did meet the criteria specified in the TMS safety screening questionnaire  
2 [29]. All subjects gave informed written consent. The study was approved by the  
3 Regional Committee on Health Research and Ethics of the Capitol Region in Denmark  
4 and was in accordance with the Helsinki declaration (Protocol H-16017716).

5

## 6 **Experimental setup**

7 Participants were sitting in a relaxed position in a commercially available TMS-chair  
8 (MagVenture, Farum, Denmark). Cushioning provided additional arm and neck  
9 support and the participant was instructed to keep the hands and arms relaxed and  
10 the eyes open throughout the experiment. A real-time EEG-TMS setup was used for  
11 the online analysis of the EEG-signal and triggered single TMS pulses when individual  
12 mu-power met the predefined criteria of the current stimulation condition (see  
13 Figure 1).

14

15 *Electrophysiological recordings:* Both EEG and EMG were recorded using a NeurOne  
16 Tesla system (NeurOne Tesla, Bittium, Oulu, Finland). The amplifiers had a sampling  
17 rate of 5kHz and we used a 2.5 kHz antialiasing low-pass filter with 24-bits resolution  
18 per channel, across a range of +/- 430 mV. To ensure that the latency of the data-  
19 delivery for the real-time processing stayed below 5ms, the data was sent directly  
20 from the EEG amplifiers Field-Programmable-Gate-Array via a user-datagram  
21 protocol (1kHz update rate over a 1Gb/s Ethernet link). The scalp EEG was recorded  
22 using a TMS compatible EEG cap (EasyCap M10 sintered Ag/AgCl multielectrodes  
23 Easy Cap, Woerthsee-Etterschlag, Germany), with equidistant spacing between the

1 63 surface electrodes. All electrodes were prepared using high-chloride, abrasive  
2 electrolyte gel (Easycap, Herrsching, Germany), until the impedance was below 5k $\Omega$ .  
3 The EMG was recorded using self-adhesive, disposable surface electrodes  
4 (NeuroLine, Ambu A/S, Denmark), and the EMG signal was transferred in the same  
5 way as the EEG signal described above. The electrodes were applied in a belly-  
6 tendon montage on first dorsal interosseous (FDI) muscle of the right hand ( the  
7 ground was placed on the right wrist), making sure that a clear muscular response  
8 was measured and that 50Hz noise was below 20uV.  
9

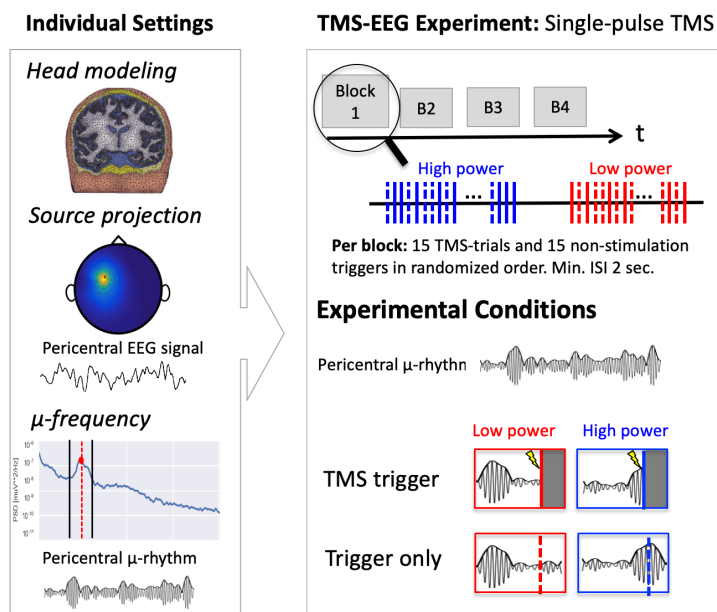

10  
11 *Figure 1: The experimental timeline: The first panel shows how the location and center*  
12 *frequency of the individual mu-rhythm were determined. The second panel illustrates the*  
13 *temporal structure of the TMS experiment and the four conditions.*

14



1 TMS: Single TMS pulses were applied using a figure-of-eight shaped MC-B70 coil  
2 connected to a MagPro 100 stimulator (Magventure, Farum, Denmark). The  
3 stimulator was set to a monophasic stimulation waveform inducing an A-P current  
4 direction in the brain. The motor hotspot (M1-HAND) was defined as the coil  
5 position and orientation that resulted in the largest and most reliable MEP  
6 amplitude, recorded from the fully relaxed FDI muscle. Stimulation intensity was  
7 individually adjusted to elicit a mean MEP amplitude of 1mV, using an in-house  
8 threshold hunting algorithm (implemented in Python) based on a previously  
9 described adaptive thresholding method [30]. Threshold hunting was initiated at  
10 47% of maximum stimulator output (MSO), and the relative standard deviation of  
11 the true threshold was assumed to be 7% [31]. The same procedure was used to  
12 estimate the Resting Motor Threshold (RMT) (MEP amplitude  $\geq 50\mu\text{V}$ ). The precise  
13 positioning of the TMS coil at the target site (FDI motor hotspot) was continuously  
14 monitored using stereotactic neuronavigation (Localite GmbH, Sankt Augustin,  
15 Germany).

16

17 *Source projection:* A radial source projection was used to extract the pericentral mu-  
18 rhythm for each subject. The source projection matrix was calculated using (i) an  
19 individual head model based on a structural T1-MRI scan, (ii) the position of the EEG  
20 channels, and (iii) the functionally determined FDI motor hotspot. Both (ii) and (iii)  
21 were registered on each individual head model using the neuronavigation. The head  
22 model was estimated using the boundary-element modelling approach [32]  
23 implemented in Fieldtrip (Version date: 2016-01-26). The nasion, as well as right and  
24 left tragus were manually marked on the MRI images. Finally, the source space

1 (weighted sum of all EEG electrodes) was estimated using the “dipoli” method  
2 implemented in fieldtrip considering a single dipole with radial orientation at the  
3 position of the FDI hotspot.

4

5 *Real time estimation of pericentral mu power:* During acquisition a ring-buffer  
6 containing the latest 500ms of data was updated upon the arrival of each sample. To  
7 limit the computational cost of the subsequent processing steps the sampling rate in  
8 this buffer was reduced to 1kHz by averaging the 5 samples received in each UDP  
9 package. A processing loop running in a separate process with real-time priority  
10 performed source projection and a discrete Fourier transform of the 500ms of data  
11 [33]. As an indicator of mu-band power we considered the fraction of the sum of the  
12 absolute squared coefficients within the defined mu-band and the total signal  
13 power, thereby obtaining a mu-band power fraction. The average update time for  
14 the processing loop was below 0.5 ms, which ensured that only very occasionally the  
15 estimate was not updated for each sample, meaning that the additional latency due  
16 to signal processing was negligible.

17

18 *Re-extraction of the pericentral my-rhythm using a Laplacian montage:* To test the  
19 influence of differences in electrode montages for extracting the mu-power we re-  
20 extracted the pericentral mu-rhythm from the raw scalp EEG for each subjects using  
21 a sensor level five-channel Laplacian montage centred on the electrode above the  
22 M1-HAND area [23]. This enabled the post-hoc determination of pre-stimulus mu-  
23 power and mu phase according to a C3-centered Laplacian montage and allowed the  
24 direct comparison of source-extracted and surface extracted mu-oscillations.

1

2 **Experimental sessions:**

3 *Structural MRI scans:* On the day before the experiment each participant was  
4 scanned using a structural T1-weighted MRI sequence (T1-w MRI). T1-w scans were  
5 done using a magnetization prepared rapid gradient echo (MPRAGE) MRI sequence  
6 with 0.85mm isotropic spatial resolution, TR = 6ms, TE = 2.7ms and flip-angle = 8° on  
7 a Philips 3T Achieva scanner (Philips, Best, Netherlands). The field of view was  
8 245x245x208mm, such that the scan covered the whole brain. The T1-w scan was  
9 required for obtaining the head model for the source projection, as well as for  
10 neuronavigation during the state-informed experiment.

11

12 *TMS-EEG Experiment:* Each experiment started with a range of pre-measurements to  
13 determine the subject specific stimulation criteria. First, the subjects were co-  
14 registered with their T1-w scan, then the individual EEG electrode positions were  
15 registered to the T1-w scan. The EEG and EMG electrodes were mounted as  
16 described above, and the signal quality of both measures were visually monitored  
17 throughout the whole experiment, and EEG channels were re-prepared in case the  
18 signal quality dropped. The next steps included the determination of the M1-HAND  
19 hotspot, the RMT and the stimulation intensity required to evoke MEPs of 1mV  
20 (1MV-MEP) amplitude for the right FDI. Both RMT and 1mV-MEP were estimated  
21 using the threshold hunting algorithm described in the experimental setup section  
22 above. Finally, the source projection matrix was calculated.

23 To identify the individual mu-rhythm, we recorded 5 minutes of EEG while the  
24 subject was resting with open eyes. The individual peak frequency was determined

1 as the peak of the mu-power spectral density (PSD) within 7-13Hz, based on the  
2 resting EEG data and the estimated source matrix. The mu-frequency band was  
3 defined as  $\pm 2$ Hz around the peak frequency. However, in cases where the lower  
4 frequency limit would be below 7Hz, the limit was set to 7Hz, resulting in a narrower  
5 frequency band for these subjects. Furthermore, the PSD maps were used to  
6 determine the highest (q75) and lowest (q25) quantiles of the mu-power, which later  
7 were used for thresholding of the power-informed stimulation.

8

9 *Power-informed stimulation:* During the experiment TMS stimulation was triggered  
10 by instances of high (q75) and low (q25) power of the endogenous pericentral mu-  
11 rhythm, using the thresholds estimated during the pre-measurements. As TMS gives  
12 rise to large artefacts in the EEG signal just after the stimulation, a non-stimulation  
13 trigger was set in 50% of the trials. This enabled post-hoc evaluation of power  
14 estimation performance in the non-stimulated trials, while power-dependent effects  
15 of spTMS on corticospinal excitability were evaluated in the 50% of trials with TMS.  
16 60 trials were collected for each of the four conditions (q75-TMS, q75-trigger-only,  
17 q25-TMS, q25-trigger-only) resulting in a total of 240 trials, split into 4 blocks. Each  
18 block contained 15 trials of each condition, resulting in a total of 60 triggers per  
19 block. Stimulation was given in blocks of either high or low power and the order  
20 between stimulations and non-stimulations triggers was pseudo-randomized, such  
21 that no more than 3 of the same kind could appear in a row.

22 Between each block, a short break of 1-5 minutes was allowed. For a few subjects,  
23 we adjusted the stimulation intensity between blocks, such that the stimulation  
24 always elicited an average MEP of around 1mV, however the total adjustment never

1 resulted in a change of more than 4% stimulator output. Average stimulator output  
2 across participants was  $70\% \pm 13\%$ . To avoid any systematic interaction between  
3 TMS pulses, the minimum inter-trial-interval (ITI) set by the algorithm was 2s. Due to  
4 the constraints set in the power-detection algorithm the actual ITI was considerably  
5 longer and had a mean of 10.3 s across all individuals. On a few occasions (less than  
6 5% of trials) the ITI either exceeded 60 seconds or was undefined (for the first trial  
7 for each block) these trials were removed from further analysis.

8

## 9 **Data Analysis**

10 *MEP analysis:* The peak-to-peak amplitude of the MEP was determined trial-by-trial  
11 by an in-house developed python script. Similar to a previously published study [22]  
12 all trials with an EMG activity  $> 50\text{mV}$  during the 100ms prior to stimulation, or with  
13 MEP amplitudes more than 2.5 standard derivations away from the mean were  
14 excluded from further analysis. On average 6.3% of trials were excluded from further  
15 analysis due to these criteria.

16 *Phase at Stimulation:* The phase at the time point of stimulation was estimated from  
17 the recorded data using a continuous Morlet wavelet transform. The transform was  
18 done for 51 frequency scales across the mu-band and the phase of the optimal  
19 frequency scale 100ms prior to stimulation was projected to the stimulation time  
20 using the same algorithmic procedure as described previously [22]. Depending on  
21 the estimated phase, all TMS trials were sorted in a post-hoc analysis into four  
22 distinct phase bins ( $0^\circ$ ,  $90^\circ$ ,  $180^\circ$ ,  $270^\circ$ ).

23 *Statistics:* To test the hypothesis that the cortico-spinal excitability is modulated by  
24 mu power at the time of stimulation while simultaneously assessing the relationship

1 between power, phase and interstimulus interval (ISI) on the individual trial basis we  
2 performed a mixed-effect analysis that included mu-power fraction (categorical –  
3 high, low), the mu-phase (categorical - 0°, 90°, 180°, 270°) and the inter-stimulus-  
4 interval between two trials (continuous – ISI) as fixed effects and the participant  
5 number as a random effect. Statistical analysis was performed using the statistical  
6 software package R (<https://www.r-project.org>). Mixed effects analysis was  
7 performed using the lme4 package (Team RC 2018) and all continuous variables  
8 were log-transformed before they were entered in the model. The significance  
9 threshold for null hypothesis testing was set to  $p < 0.05$ .

10 To directly test evidence for the null hypothesis we additionally used Bayesian  
11 analysis of covariance as implemented in Jasp v. 0.11.1 with the MEP as dependent  
12 variable, high/low power and phase discretized into four bins as a fixed-factors,  
13 subject as a random factor and included the logarithm of the ISI as a covariate.

14

15 *Analysis of the data extracted by Laplacian Surface Montage re-referencing:* The  
16 analysis performed for source-extracted mu-power were also run for the post-hoc  
17 re-referenced Laplacian data. The power in mu-band in the Laplacian montage was  
18 only very weakly related to the power in the original source projection meaning that  
19 the power fraction could no longer be reasonably divided into two separate bins.  
20 Therefore, for the mixed model, we only included the highest and lowest quartile of  
21 the Laplacian-power fraction in order to keep the data as similar as possible to the  
22 source-triggered analysis, even though this meant bisecting data. However, in the  
23 analyses that considered a continuous representation of the power fraction  
24 (Bayesian ANCOVA) we utilized all the available data.

1

## 2 **Results**

### 3 *Online power-triggered EEG-TMS:*

4 We verified that the online power triggering worked by assessing the power fraction  
5 estimate for the non-stimulated trials in a 500ms window centered at the intended  
6 stimulation timepoint. The mean power fraction was  $0.15 \pm 0.07$  in the low-power  
7 triggered condition and  $0.30 \pm 0.12$  in the high-power condition, indicating that the  
8 pericentral mu-power was successfully targeted by brain-state informed spTMS  
9 (Figure 2A). The ISI during the low-power was  $13.9 \pm 4.2$  ms and  $10.5 \pm 2.0$  ms during  
10 the high-triggered condition. A paired t-test (unequal variance) testing for  
11 differences in the ISI indicated that duration was significantly influenced by the  
12 triggering condition ( $t_{14} = 2.47$ ;  $p = 0.02$ ) (Figure 2B).

13

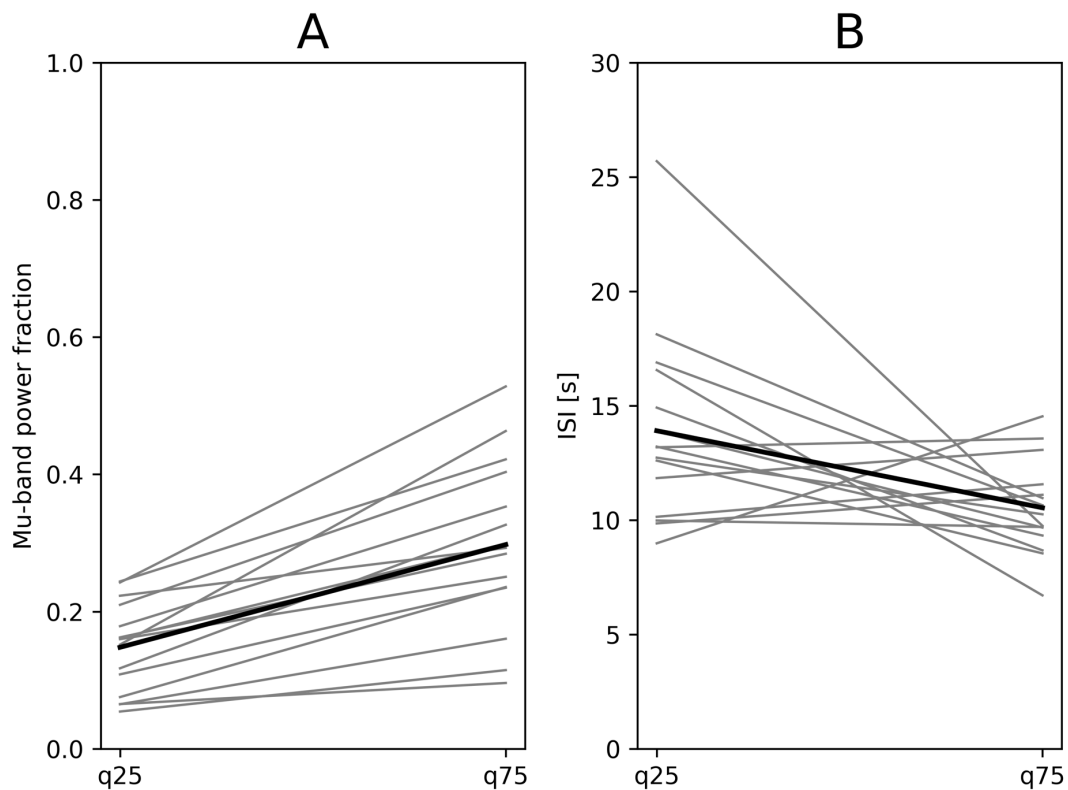

14

1 *Figure 2: Precision of Targeting: A) shows the power fraction in the mu-band at in the non-*  
2 *stimulated trial, centered at the intended stimulation point in high (q75) and low (q25)*  
3 *power condition. Grey lines represent individuals, the black line the grand average B) shows*  
4 *the average ISI in high (q75) and low (q25) power condition in stimulated trials. Grey lines*  
5 *represent individuals average, the black line the grand average*

6

7 The accuracy of the phase detection algorithm was evaluated by comparing the  
8 projected phase to a centered phase estimate for non-stimulated trials as also  
9 described in a previous publications [22]. As expected, this revealed that the phase  
10 estimation accuracy was lower for the low power condition (q25) with a mean  
11 absolute error of 61°, whereas the mean absolute error in the q75 condition was  
12 comparable to our previous work with a value of 47°[22].

13

14 *Mu-rhythm extracted by source projection:* The average MEP amplitude was 1.16 ±  
15 0.39 mV across both conditions. The mean MEP amplitude in the high-power  
16 triggered condition was 1.14 mV compared to 1.17 mV in the low-power triggered  
17 condition. The linear mixed-effects model, that treated mu-power and mu-phase  
18 and ISI as fixed effects and participant as a random effect showed no significant main  
19 effect for power ( $\chi^2(1) = 0.32$ ;  $p=0.57$ ) (Figure 3A). Also, the main effect of phase was  
20 not significant ( $\chi^2(3) = 1.54$ ;  $p=0.20$ ) (Figure 3B), while ISI significantly modulated the  
21 MEP amplitude ( $\chi^2(1) = 5.14$ ;  $p=0.02$ ). None of the interaction terms were significant.  
22 The main effect of ISI was caused by an increase of MEP amplitude at when pulses  
23 were given at longer intervals (Figure 3C).

24



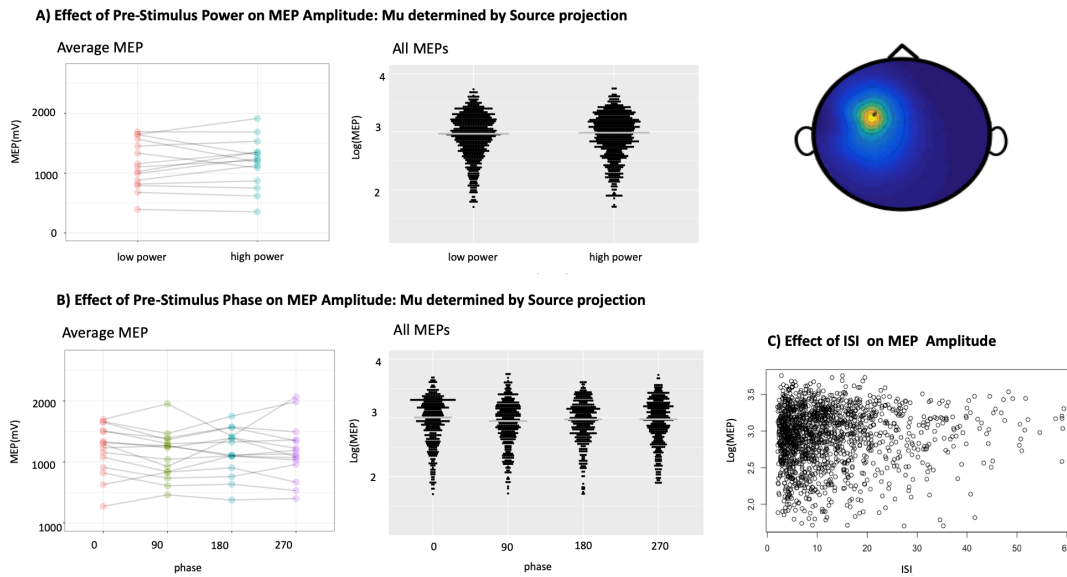

1

2 *Figure 3: Source Projection: MEP as a function of Power and ISI A) shows the average MEP*  
3 *amplitude at stimulation point in high (q75) and low (q25) power condition. Grey lines*  
4 *represent individuals, the black line the grand average B) shows the relationship between*  
5 *pre-stimulus phase and MEP amplitude and C) shows the relationship between MEP and ISI.*

6

7 *Bayesian Analysis: Using Bayesian analysis of covariance (ANCOVA) to assess*  
8 *inclusion probabilities for each of the predictors we found no evidence for inclusion*  
9 *of ISI (Bayes Factor (BF): 0.41), strong evidence against inclusion of power fraction*  
10 *(BF: 0.04) and extreme evidence against inclusion of phase (BF=0.006) (Table1).*

11

12 *Mu-rhythm extracted by Laplacian Surface montage: To test whether the EEG*  
13 *montage used to extract pericentral power influenced the detected relationship*  
14 *between extracted power and cortical excitability, we re-referenced the EEG data*  
15 *using a sensor level Laplacian montage centered on M1-HAND, similar to previous*  
16 *power-triggered experiments [23, 24] and Laplacian mu-oscillations for each TMS*  
17 *pulse were extracted post-hoc. The linear mixed-effects model, that treated*

1 Laplacian mu-power fraction and mu-phase and ISI as fixed effects reveal a  
2 significant power-effect ( $\chi^2(1) = 5.91$ ;  $p=0.01$ ) indicating that the MEP amplitude was  
3 larger when Laplacian mu-power was high (Figure 4A). For phase, the Laplacian mu-  
4 extraction agreed with the initial source-projected data and showed no significant  
5 effect of mu-phase ( $\chi^2(3) = 0.56$ ;  $p=0.64$ ) (Figure 4B). Figure 4 displays the MEP as a  
6 function of phase to further illustrate that no effect of phase could be seen. The ISI  
7 effect was significant as in the analysis of the source projected data ( $\chi^2(1) = 3.9$ ;  
8  $p=0.04$ ).

9

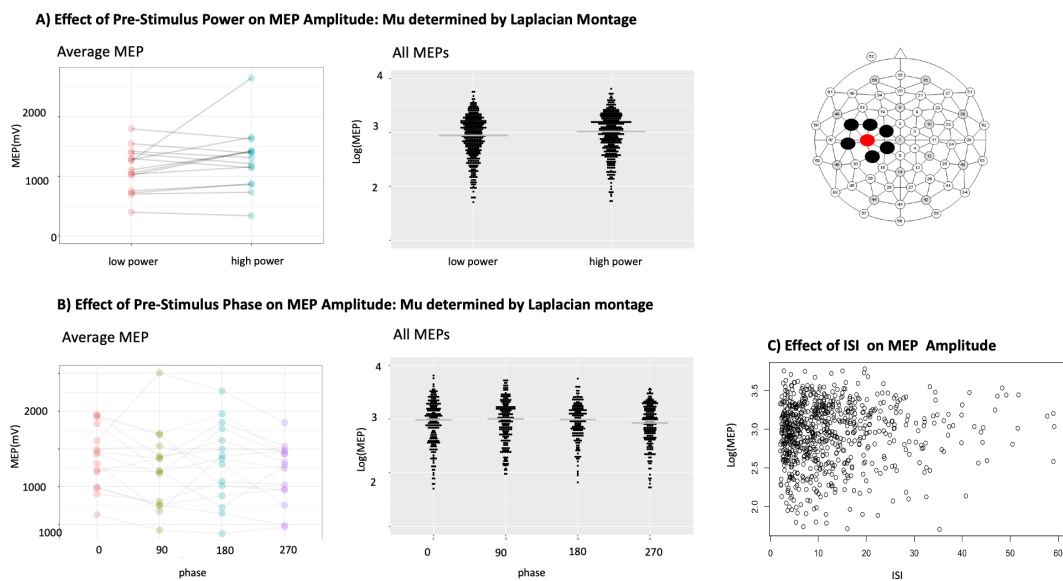

10

11 *Figure 4: Laplacian montage: MEP as a function of Power and ISI A) shows the*  
12 *average MEP amplitude at stimulation point in high (q75) and low (q25) power*  
13 *condition. Grey lines represent individuals, the black line the grand average B) shows*  
14 *the relationship between pre-stimulus phase and MEP amplitude and C) shows the*  
15 *relationship between MEP and ISI.*

1 *Bayesian Analysis:* A Bayesian ANCOVA which considered all the data with the  
2 Laplacian montage by including the continuous power fraction as an independent  
3 variable. In this analysis the inclusion probabilities showed very strong evidence for  
4 inclusion of the power fraction (BF: 75.9) and no evidence for inclusion of ISI (BF:  
5 0.941) and again extreme evidence against the inclusion of phase (BF: 0.002).  
6  
7 *Spatial comparison of radial source and Laplacian montage and pairwise electrode*  
8 *comparisons:* The location of the Laplacian montage was more posterior than the  
9 radial source at the individual hotspot, as indicated by the mean MNI coordinates  
10 (Laplacian montage, electrode 17: [-62 , -22, 73]; radial source at hotspot [-55, -  
11 13, 85]). The mean displacement from center of gravity (COG) of each montage was  
12 similar in both montages (electrode 17: 9.9; hotspot: 9.5 (both MNI mm)). To  
13 compare if specific electrodes preferentially contributed to the effect observed in  
14 the Laplacian montage, we also calculated mu-power based on the center electrode  
15 (electrode above M1-HAND) and each of its neighbors individually (see figure 5B) by  
16 using separate Bayesian ANCOVAs with the logarithm of the MEP as dependent  
17 variable, subjects as a random factor, the detected phase-bin for the relevant  
18 montage as an independent factor and the logarithm of ISI and the relevant power  
19 fraction as covariates. We then quantified the effect of power fraction in each of  
20 these six electrode pairs at the Bayes factor for inclusion of the continuous power  
21 fraction in the model. The results indicated that the significant effect of power was  
22 driven by a signal gradient towards the medial/anterior direction in electrode space  
23 (difference between electrodes 7 and 17). In all of these models there were extreme  
24 evidence against the inclusion of phase (BF<=0.006).

1

2

A) Visualization of the radial source projected to the scalp (red) and the center of the Laplacian montage (blue)

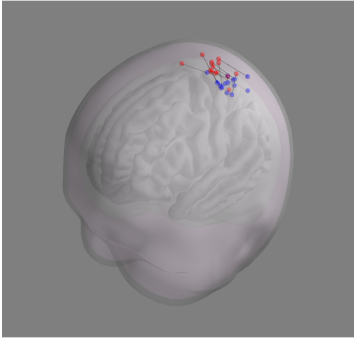

B) Visualization of the source projected to the scalp and the center of the Laplacian montage (blue)

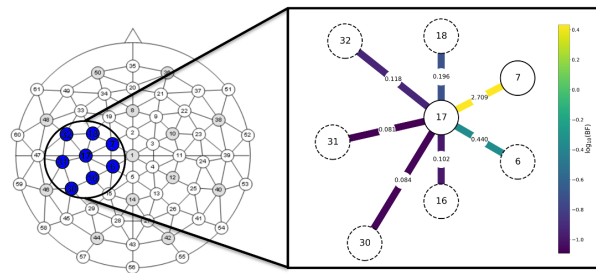

3

4 *Figure 5: A) shows a visualization of the individual source locations projected to the scalp and*  
5 *the center of the Laplacian montage. Grey lines connect the points for each individual*  
6 *subject. B) Shows the pairwise electrode comparisons in the Laplacian montage checking if*  
7 *specific electrodes preferentially contributed to the observed effect of power. Color coding is*  
8 *according the log-transformed Bayes factor.*

9

## 10 **Discussion:**

11 Here, we demonstrate that the results of mu-power triggered spTMS are dependent  
12 on the electrode montage used to extract the fluctuating expressions of individual  
13 pericentral mu-oscillation. A radial source projection, extracting mu-power from the  
14 individual motor hotspot for the contralateral FDI muscle, failed to show power-  
15 dependent modulation of corticospinal excitability. However, when re-extracting  
16 mu-power according to a Laplacian surface montage over M1-HAND, we found a  
17 positive relation between pre-stimulation mu-power and MEP amplitude. While the

1 effect of mu-power on MEP amplitude was montage-dependent, both montages  
2 concordantly reported no significant effect of mu-phase. Indeed, Bayesian analysis,  
3 confirmed that there was strong evidence in favor of the null hypothesis, indicating  
4 that mu-phase fluctuations in corticospinal excitability for both montages did not  
5 play an important role, thereby replicating the results of our previous work [22]. Our  
6 results have important general implications, showing that the way the central EEG  
7 signal is extracted from the cortical region of interest will have profound impact on  
8 what kind of state-dependent effects of the expressed power or phase in the  
9 frequency-band of interest will be revealed by the TMS-EEG approach.

10

11 Which property rendered the Laplacian surface montage sensitive to the fraction of  
12 pericentral mu-power that has a positive relationship with cortico-spinal excitability?  
13 Both, the source projection at the precentral motor hotspot and the Laplacian  
14 surface montage were sensitive to radial sources of EEG activity around the central  
15 sulcus. The fact that they nonetheless produced different results suggests a complex  
16 spatial relationship between pericentral mu-activity and corticospinal excitability and  
17 it is interesting to note the spatial differences between the tested montages. The  
18 Laplacian montage was more posterior with an average location over the postcentral  
19 gyrus (i.e. the somatosensory cortex) while the source projection was on average  
20 located over the precentral gyrus (i.e. the primary motor cortex). These results  
21 imply that not all sources of pericentral mu-activity in the sensorimotor hand areas  
22 modulate cortico-spinal excitability. We cannot exclude that tangentially oriented  
23 sources may be relevant as well. Pairwise analysis of the electrodes contributing to  
24 the effect seen with the Laplacian montage suggest that a signal gradient towards

1 the medial/anterior direction in electrode space may have contributed to the  
2 positive relationship between mu-power and MEP amplitude. Further, more  
3 systematic investigations on the impact of different pericentral sources and their  
4 spatial location and orientation are required to clarify this question.

5 Our results fit with the previous body of evidence as studies reporting a positive  
6 correlation between pericentral mu-power and MEP amplitude used a surface  
7 Laplacian [23, 24] while the studies that used other ways of mu-extraction either  
8 reported a negative relationship or no relationship between mu-power and MEP  
9 amplitude [14, 18, 22], [13, 16, 19].

10 How do the present results support the gating-through-inhibition theory of cortical  
11 oscillatory activity in the alpha range [2]? The gating-through-inhibition theory  
12 would predict a negative relationship between ongoing mu-activity and corticospinal  
13 excitability (i.e., MEP amplitude). Apart from a few early reports, all TMS-EEG  
14 studies either found no relation or a positive relation which is in apparent contrast to  
15 the gating-through-inhibition theory. But maybe the MEP amplitude may not be the  
16 right measure to test the gating-through-inhibition theory which primarily focuses  
17 on cortical processing of sensory inputs and not on generating motor outputs and  
18 phase and amplitude of the mu-rhythm may still exert gating-through-inhibition in  
19 postcentral sensory cortex. This may or may not have secondary effects on  
20 precentral motor cortex which may be opposite in sign, causing corticospinal  
21 disinhibition when cortical inhibition in sensory cortex is maximal.

22 Whatever the relationship between pericentral mu-activity and MEP amplitude may  
23 be, any relationship will not be rigidly expressed regardless of the magnitude of  
24 cortex stimulation (i.e., the TMS intensity) or the ongoing level of neuronal activity

1 (i.e. the firing rate) [24]. This notion is corroborated by a modelling study using a  
2 simple non-compartmental threshold-crossing motoneuron model without dendrites  
3 [34]. In that study, Matthews showed that the response of the model neuron to a  
4 stimulus depended upon stimulus strength, synaptic membrane noise, and intrinsic  
5 tonic firing rate of the neuron (induced by intrinsic background drive). The study  
6 revealed a non-linear relationship between background firing rate and the strength  
7 of a brief external stimulus: For weak stimuli, the response increased with increasing  
8 intrinsic tonic firing rate but for strong stimuli, the response was maximal at a low  
9 firing rate and then decreased for higher firing rates. Matthews concluded that  
10 “transferring” these findings to corticospinal neurons makes it unlikely that the  
11 magnitude of the descending volley elicited by a given cortical stimulus  
12 (‘excitability’) will always increase with the initial level of cortical activity.  
13 Transferring these observations to TMS-EEG studies, it is unlikely that the MEP  
14 amplitude elicited by a TMS pulse will monotonically scale with the level of cortical  
15 oscillatory activity (and the associated changes in neuronal firing rates). Instead,  
16 strong TMS pulses can be expected to elicit larger MEPs during low levels of intrinsic  
17 neural activity (e.g. low firing rate at high mu- power), while weak TMS pulses will  
18 elicit larger MEPs during high levels of intrinsic neuronal activity (e.g. high intrinsic  
19 firing rate at low mu-power). This flip in the sign of the relationship between mu-  
20 power and MEP amplitude is illustrated in Fig.7. Accordingly, a recent TMS-EEG study  
21 demonstrated that high mu-power (e.g. low endogenous activity) was only  
22 associated with larger MEP amplitudes during higher TMS intensities [24]. The non-  
23 monotonic interaction between intrinsic firing rate (produced by transsynaptic drive)  
24 and stimulus response suggested by Matthews [34] also reconcile our present

1 findings (i.e., no relationship or positive relationship between power and MEP  
2 depending on montage) with the negative power MEP relationship reported in our  
3 recent study [22] in which we only examined the highest power quartile in that  
4 work.  
5

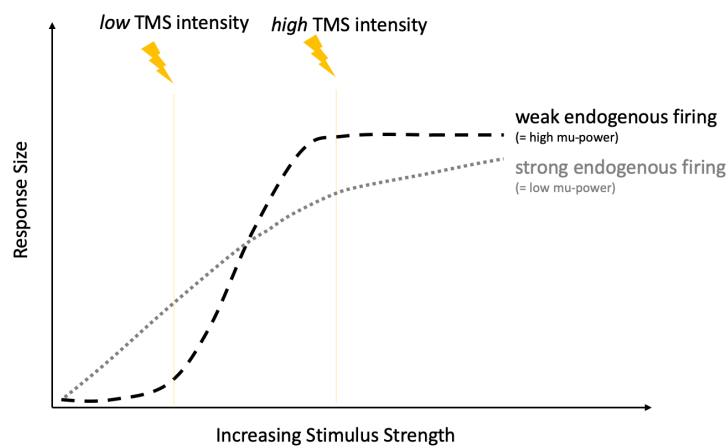

6  
7 *Figure 6: Shows a possible interaction between stimulus strength and background activity.*  
8 *Figure adapted after Matthews. The Effect of Firing on the Excitability of a Model Motor*  
9 *neuron and its Implications for Cortical Stimulation; Journal of Physiology (1999).*

10  
11 Our results have major implications for the use of power-informed TMS-EEG as a  
12 tool to better control the cortical “state” at the time of stimulation and hereby, to  
13 render the brain response to TMS less variable [35]. Overall, the effect size of the  
14 MEP amplitude modulation was modest and sometimes not detectable using  
15 conventional average statistics (e.g. ANOVAs) in those studies that reported a  
16 relation between pre-stimulus mu-power and MEP amplitude [22-24]. This suggests  
17 that the contribution of the pericentral “oscillatory state” to the overall trial-to-trial



1 variability of the MEP is generally low. As long as the interactions between EEG  
2 montage, neural background noise, intrinsic firing rate and stimulus intensity are not  
3 better understood, the potential of power-triggered TMS to significantly improve the  
4 intra-individual variability of single-pulse MEPs remains limited. Additionally, it has  
5 to be mentioned that other oscillatory rhythms also have been suggested to  
6 modulate cortico-spinal excitability. Especially the sensorimotor beta rhythm but  
7 also gamma oscillations and cortico-muscular coherence have also been proposed to  
8 modulate cortico-spinal excitability [13, 16, 18-20, 36, 37]. More complex  
9 interactions like cross-frequency coupling between cortical oscillation with between  
10 difference frequency bands are also possible modulators that have not yet been  
11 explored.

12

13 Regardless of the mode of extracting pericentral mu-activity, we found no  
14 modulatory effects of mu-phase on MEP amplitude. The use of Bayesian statistics  
15 also allowed us to move beyond not rejecting the null hypothesis as Bayesian  
16 statistics detected strong evidence *against* the contribution of mu-phase to  
17 fluctuations in corticospinal excitability. Due to a small effect size, effects of mu-  
18 power on MEP amplitude may only emerge, if many more (e.g. >100) MEP trials per  
19 mu-phase are recorded.

20 The interval between subsequent TMS pulses is another underexplored aspect of the  
21 TMS-EEG approach. In our study, we ensured that TMS was given at very low  
22 repetition frequency with a large jitter. This decision was motivated by several TMS  
23 studies showing that continuous quasi-repetitive, or jittered application of supra-  
24 threshold TMS in the 0.5 - 0.3 Hz range can induce changes in the excitatory-

1 inhibitory balance in M1 and cause change in the inhibitory/faciliatory balance in M1  
2 [38] [39] [40]. Studies also showed that long ISIs (> 0.2 Hz) significantly improve the  
3 reliability and lower the variability of intra-individual MEPs [41].

4 Our experimental procedure resulted in long and highly jittered ISIs, and replicated  
5 our previous finding that MEPs tend to be larger when long ISIs are used [22]. This  
6 suggests that the preceding pulse may have some conditioning influence on the MEP  
7 response produced by the next TMS pulse. These “recency” effects together with the  
8 virtue of TMS to shape corticospinal excitability and cortical oscillatory activity,  
9 underscore the need that TMS-EEG always need to consider whether or how much  
10 the repeated administration of supra-motor threshold TMS pulses “actively” shapes  
11 regional cortical excitability and oscillatory activity rather than “passively” probing it.

12

13 Taken together, both experimental and theoretical work suggests that the  
14 relationship between regional neuronal activity and corticospinal excitability is  
15 complex and may interact with a range of different experimental choices such as  
16 stimulation intensity, ISI and the number of given stimuli that influence the signal to  
17 noise ration and the intrinsic inhibitory/excitatory balance in the stimulated cortex  
18 [21, 22, 34, 42, 43]. The relationship between cortical excitability, cortical activity  
19 and basic experimental parameters has to be better understood and investigated  
20 before brain-state triggered TMs can become a standard technique to reduce inter-  
21 trial variability and increase the effectiveness of TMS protocols.

22

23

## 1 References

- 2
- 3 [1] Pfurtscheller G, Stancak A, Jr., Neuper C. Event-related synchronization  
4 (ERS) in the alpha band--an electrophysiological correlate of cortical idling: a  
5 review. *Int J Psychophysiol* 1996;24(1-2):39-46.
- 6 [2] Jensen O, Mazaheri A. Shaping functional architecture by oscillatory alpha  
7 activity: gating by inhibition. *Frontiers in human neuroscience* 2010;4:186.
- 8 [3] Klimesch W, Sauseng P, Hanslmayr S. EEG alpha oscillations: the  
9 inhibition-timing hypothesis. *Brain Res Rev* 2007;53(1):63-88.
- 10 [4] Haegens S, Osipova D, Oostenveld R, Jensen O. Somatosensory working  
11 memory performance in humans depends on both engagement and  
12 disengagement of regions in a distributed network. *Hum Brain Mapp*  
13 2010;31(1):26-35.
- 14 [5] Kerlin JR, Shahin AJ, Miller LM. Attentional gain control of ongoing cortical  
15 speech representations in a "cocktail party". *J Neurosci* 2010;30(2):620-8.
- 16 [6] Sauseng P, Klimesch W, Heise KF, Gruber WR, Holz E, Karim AA, et al.  
17 Brain oscillatory substrates of visual short-term memory capacity. *Curr Biol*  
18 2009;19(21):1846-52.
- 19 [7] de Pesters A, Coon WG, Brunner P, Gunduz A, Ritaccio AL, Brunet NM, et  
20 al. Alpha power indexes task-related networks on large and small scales: A  
21 multimodal ECoG study in humans and a non-human primate. *Neuroimage*  
22 2016;134:122-31.
- 23 [8] Romei V, Brodbeck V, Michel C, Amedi A, Pascual-Leone A, Thut G.  
24 Spontaneous fluctuations in posterior alpha-band EEG activity reflect variability  
25 in excitability of human visual areas. *Cereb Cortex* 2008;18(9):2010-8.
- 26 [9] Romei V, Gross J, Thut G. On the role of prestimulus alpha rhythms over  
27 occipito-parietal areas in visual input regulation: correlation or causation? *J*  
28 *Neurosci* 2010;30(25):8692-7.
- 29 [10] Strauss A, Wostmann M, Obleser J. Cortical alpha oscillations as a tool for  
30 auditory selective inhibition. *Frontiers in human neuroscience* 2014;8:350.
- 31 [11] Craddock M, Poliakoff E, El-Deredy W, Klepousniotou E, Lloyd DM. Pre-  
32 stimulus alpha oscillations over somatosensory cortex predict tactile  
33 misperceptions. *Neuropsychologia* 2017;96:9-18.
- 34 [12] Haegens S, Nacher V, Luna R, Romo R, Jensen O. alpha-Oscillations in the  
35 monkey sensorimotor network influence discrimination performance by  
36 rhythmical inhibition of neuronal spiking. *Proc Natl Acad Sci U S A*  
37 2011;108(48):19377-82.
- 38 [13] Zarkowski P, Shin CJ, Dang T, Russo J, Avery D. EEG and the variance of  
39 motor evoked potential amplitude. *Clinical EEG and neuroscience*  
40 2006;37(3):247-51.
- 41 [14] Sauseng P, Klimesch W, Gerloff C, Hummel FC. Spontaneous locally  
42 restricted EEG alpha activity determines cortical excitability in the motor cortex.  
43 *Neuropsychologia* 2009;47(1):284-8.
- 44 [15] Takemi M, Masakado Y, Liu M, Ushiba J. Event-related desynchronization  
45 reflects downregulation of intracortical inhibition in human primary motor  
46 cortex. *J Neurophysiol* 2013;110(5):1158-66.

- 1 [16] Maki H, Ilmoniemi RJ. EEG oscillations and magnetically evoked motor  
2 potentials reflect motor system excitability in overlapping neuronal populations.  
3 Clin Neurophysiol 2010;121(4):492-501.
- 4 [17] van Elswijk G, Maij F, Schoffelen JM, Overeem S, Stegeman DF, Fries P.  
5 Corticospinal beta-band synchronization entails rhythmic gain modulation. J  
6 Neurosci 2010;30(12):4481-8.
- 7 [18] Berger B, Minarik T, Liuzzi G, Hummel FC, Sauseng P. EEG oscillatory  
8 phase-dependent markers of corticospinal excitability in the resting brain.  
9 BioMed research international 2014;2014:936096.
- 10 [19] Schulz H, Ubelacker T, Keil J, Muller N, Weisz N. Now I am ready-now i am  
11 not: The influence of pre-TMS oscillations and corticomuscular coherence on  
12 motor-evoked potentials. Cereb Cortex 2014;24(7):1708-19.
- 13 [20] Keil J, Timm J, Sanmiguel I, Schulz H, Obleser J, Schonwiesner M. Cortical  
14 brain states and corticospinal synchronization influence TMS-evoked motor  
15 potentials. J Neurophysiol 2014;111(3):513-9.
- 16 [21] Iscan Z, Nazarova M, Fedele T, Blagovechtchenski E, Nikulin VV. Pre-  
17 stimulus Alpha Oscillations and Inter-subject Variability of Motor Evoked  
18 Potentials in Single- and Paired-Pulse TMS Paradigms. Frontiers in human  
19 neuroscience 2016;10:504.
- 20 [22] Madsen K, Karabanov A, Krohne L, Safeldt M, Tomasevic L, Siebner H. No  
21 trace of phase: Corticomotor excitability is not tuned by phase of pericentral mu-  
22 rhythm. bioRxiv 2019.
- 23 [23] Thies M, Zrenner C, Ziemann U, Bergmann TO. Sensorimotor mu-alpha  
24 power is positively related to corticospinal excitability. Brain Stimul 2018.
- 25 [24] Ogata K, Kakazono H, Uehara T, Tobimatsu S. Prestimulus cortical EEG  
26 oscillations can predict the excitability of the primary motor cortex. Brain Stimul  
27 2019;in press.
- 28 [25] Bergmann TO, Lieb A, Zrenner C, Ziemann U. Pulsed Facilitation of  
29 Corticospinal Excitability by the Sensorimotor mu-Alpha Rhythm. J Neurosci  
30 2019;39(50):10034-43.
- 31 [26] Zrenner C, Gordon PC, Desideri D, Steenros M, Belardinelli P. Brain-state  
32 dependnet TMS triggered by individual cortical source actvity using online  
33 beamforming. Brain Stimulation 2019;12 522.
- 34 [27] Schaworonkow N, Caldana Gordon P, Belardinelli P, Ziemann U,  
35 Bergmann TO, Zrenner C. mu-Rhythm Extracted With Personalized EEG Filters  
36 Correlates With Corticospinal Excitability in Real-Time Phase-Triggered EEG-  
37 TMS. Frontiers in neuroscience 2018;12:954.
- 38 [28] Zrenner C, Desideri D, Belardinelli P, Ziemann U. Real-time EEG-defined  
39 excitability states determine efficacy of TMS-induced plasticity in human motor  
40 cortex. Brain Stimul 2018;11(2):374-89.
- 41 [29] Rossi S, Hallett M, Rossini PM, Pascual-Leone A. Safety, ethical  
42 considerations, and application guidelines for the use of transcranial magnetic  
43 stimulation in clinical practice and research. Clin Neurophysiol  
44 2009;120(12):2008-39.
- 45 [30] Groppa S, Oliviero A, Eisen A, Quartarone A, Cohen LG, Mall V, et al. A  
46 practical guide to diagnostic transcranial magnetic stimulation: report of an IFCN  
47 committee. Clin Neurophysiol 2012;123(5):858-82.
- 48 [31] Karabanov A, Raffin E, Siebner H. The resting motor threshold – restless  
49 or resting ? Brainstimulation 2015;Submitted.

- 1 [32] Oostendorp TF, van Oosterom A. Source parameter estimation in  
2 inhomogeneous volume conductors of arbitrary shape. *IEEE Trans Biomed Eng*  
3 1989;36(3):382-91.
- 4 [33] Frigo M, Johnson SG. The design and implementation of FFTW3.  
5 *Proceedings of the IEEE* 2005;93(2):216e31.
- 6 [34] Matthews PB. The effect of firing on the excitability of a model  
7 motoneurone and its implications for cortical stimulation. *J Physiol* 1999;518 (  
8 Pt 3):867-82.
- 9 [35] Ziemann U, Siebner HR. Inter-subject and Inter-session Variability of  
10 Plasticity Induction by Non-invasive Brain Stimulation: Boon or Bane? *Brain*  
11 *Stimul* 2015;8(3):662-3.
- 12 [36] Hussain SJ, Claudino L, Bonstrup M, Norato G, Cruciani G, Thompson R, et  
13 al. Sensorimotor Oscillatory Phase-Power Interaction Gates Resting Human  
14 Corticospinal Output. *Cereb Cortex* 2018.
- 15 [37] Torrecillos F, Falato E, Pogosyan A, West T, Di Lazzaro V, Brown P. Motor  
16 cortex inputs at the optimum phase of beta cortical oscillations undergo more  
17 rapid and less variable corticospinal propagation. *J Neurosci* 2019.
- 18 [38] Gorsler A, Baumer T, Weiller C, Munchau A, Liepert J. Interhemispheric  
19 effects of high and low frequency rTMS in healthy humans. *Clin Neurophysiol*  
20 2003;114(10):1800-7.
- 21 [39] Cincotta M, Borgheresi A, Gambetti C, Balestrieri F, Rossi L, Zaccara G, et  
22 al. Suprathreshold 0.3 Hz repetitive TMS prolongs the cortical silent period:  
23 potential implications for therapeutic trials in epilepsy. *Clin Neurophysiol*  
24 2003;114(10):1827-33.
- 25 [40] Julkunen P, Saisanen L, Hukkanen T, Danner N, Kononen M. Does second-  
26 scale intertrial interval affect motor evoked potentials induced by single-pulse  
27 transcranial magnetic stimulation? *Brain Stimul* 2012;5(4):526-32.
- 28 [41] Hassanzahraee M, Zoghi M, Jaberzadeh S. Longer Transcranial Magnetic  
29 Stimulation Intertrial Interval Increases Size, Reduces Variability, and Improves  
30 the Reliability of Motor Evoked Potentials. *Brain connectivity* 2019;9(10):770-6.
- 31 [42] Schaworonkow N, Triesch J, Ziemann U, Zrenner C. EEG-triggered TMS  
32 reveals stronger brain state-dependent modulation of motor evoked potentials  
33 at weaker stimulation intensities. *Brain Stimul* 2018.
- 34 [43] Siebner HR, Hartwigsen G, Kassuba T, Rothwell JC. How does transcranial  
35 magnetic stimulation modify neuronal activity in the brain? Implications for  
36 studies of cognition. *Cortex* 2009;45(9):1035-42.

37  
38

39 **Conflict of Interest:**

40 Hartwig R. Siebner has received honoraria as speaker from Sanofi Genzyme,  
41 Denmark and Novartis, Denmark, as consultant from Sanofi Genzyme, Denmark and  
42 Lundbeck AS, Denmark, and as editor-in-chief (*Neuroimage Clinical*) and senior  
43 editor (*NeuroImage*) from Elsevier Publishers, Amsterdam, The Netherlands. He has

1 received royalties as book editor from Springer Publishers, Stuttgart, Germany and  
2 from Gyldendal Publishers, Copenhagen, Denmark.

3

4 **Acknowledgements:**

5 This work was supported by the Novo Nordisk Foundation Interdisciplinary Synergy  
6 Program 2014 ["Biophysically adjusted state-informed cortex stimulation (BASICS);  
7 NNF14OC0011413]. Hartwig R. Siebner holds a 5-year professorship in precision  
8 medicine at the Faculty of Health Sciences and Medicine, University of Copenhagen  
9 which is sponsored by the Lundbeck Foundation (Grant Nr. R186-2015-2138).

10

11

12
